# Supplementary material for: miR-494 in Extracellular Vesicles as a Potent Biomarker of Chronic Myeloid Leukemia Treatment with Tyrosine Kinase Inhibitors
Source: MDPI journal article supplement (doi:10.3390/hemato3020026), 2022-06-13
Supplement: s1 [file s1]

Archive with 1 entries (1 files):
- hemato-1671878-supplementary.pdf
