# Supplementary material for: miR-494 in Extracellular Vesicles as a Potent Biomarker of Chronic Myeloid Leukemia Treatment with Tyrosine Kinase Inhibitors
Source: MDPI journal article supplement (doi:10.3390/hemato3020026), 2022-06-13
Supplement: s1 [file s1 › hemato-1671878-supplementary.pdf]

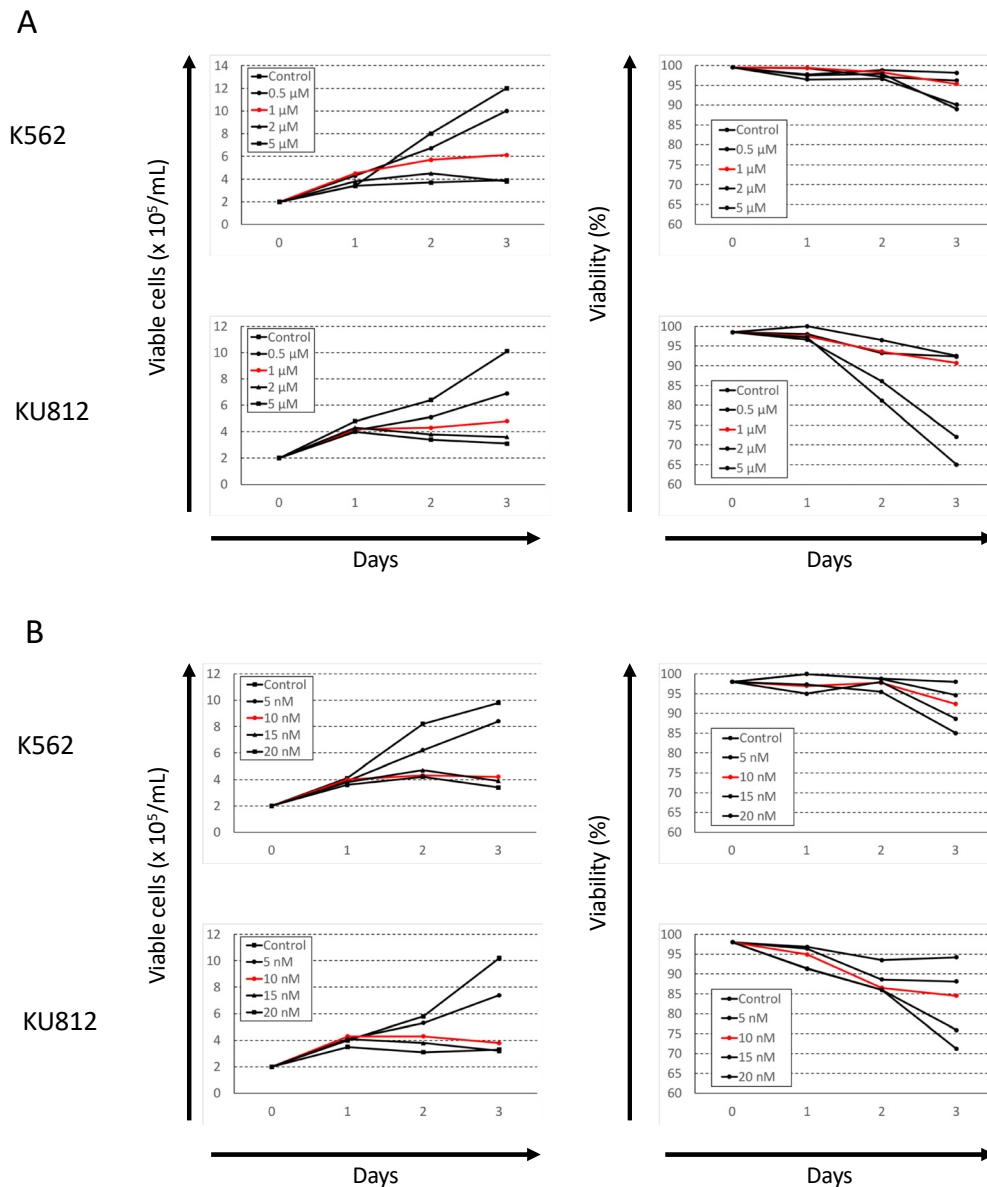

**Supplemental Figure S1.** Cell viability analysis of imatinib or dasatinib treatment. Both cells were cultured under normal conditions with/without each concentration and kind of TKIs for 24, 48, and 72 h. The cell growth and viability of two cell lines were examined by trypan blue exclusion using hemocytometer counting under a microscope. Cells were treated with (A) imatinib or (B) dasatinib. Each data point represents the mean of two independent experiments.
